# Supplementary material
Source: publisher figshare collection journal article supplement (https://acs.figshare.com/ndownloader/files/30623291)
Supplement: Supplementary file 1 [file 30623291]

# **Dimeric artesunate-phosphatidylcholine based liposomes for irinotecan delivery as a combination therapy approach**

Wei He, Yawei Du, Tao Wang, Ji Wang, Lei Cheng and Xinsong Li\*

School of Chemistry and Chemical Engineering, Southeast University, Nanjing, 211189, P. R. China

\* Email of corresponding author: lixs@seu.edu.cn (X Li)

## **Table of Contents**

**Figure S1.** HPLC elution curve of dARTPC incubated in PBS at pH 5.0 indicating ART and DHA peaks.

**Figure S2.** TEM image of the liposomes after incubation in PBS solution at pH 5.0 for 48 h.

**Figure S3.** Quantitative analyses of MCF-7 cells after incubation of 24 h.

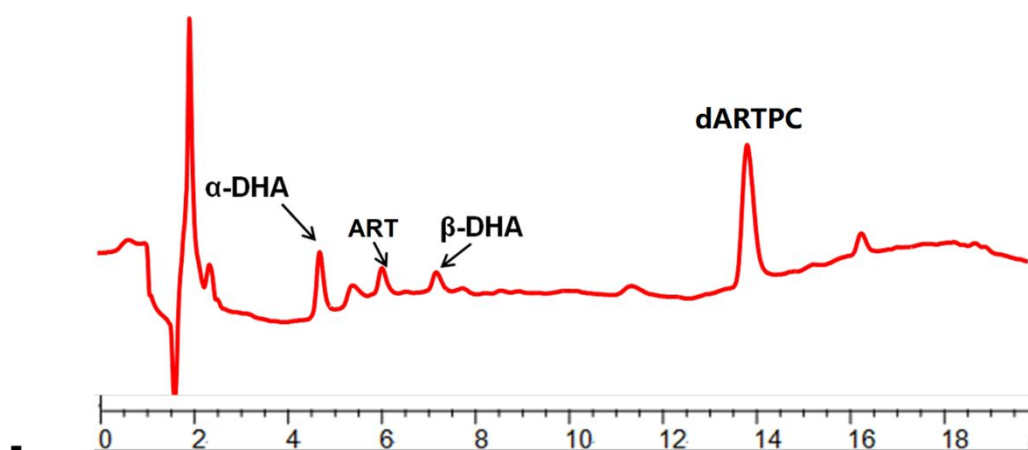

**Figure S1.** HPLC elution curve of dARTPC incubated in PBS at pH 5.0 indicating ART and DHA peaks.

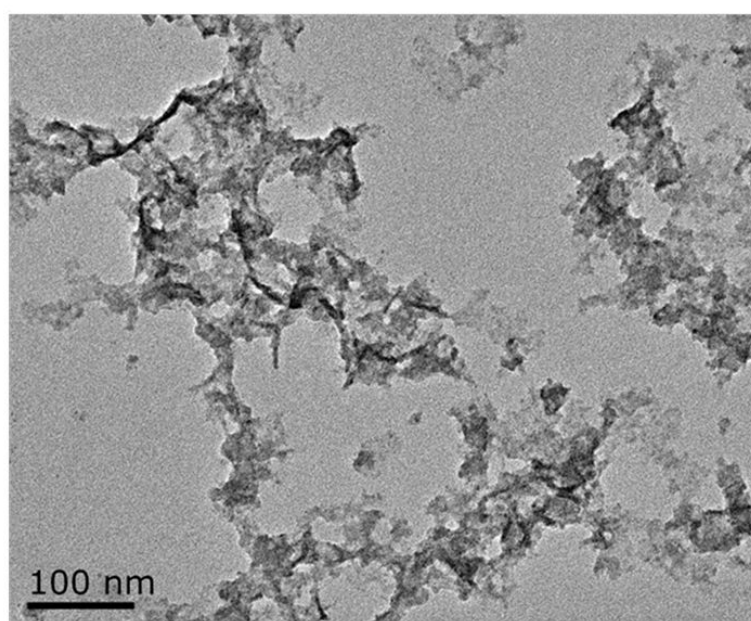

**Figure S2.** TEM image of the liposomes after incubation in PBS solution at pH 5.0 for 48 h.

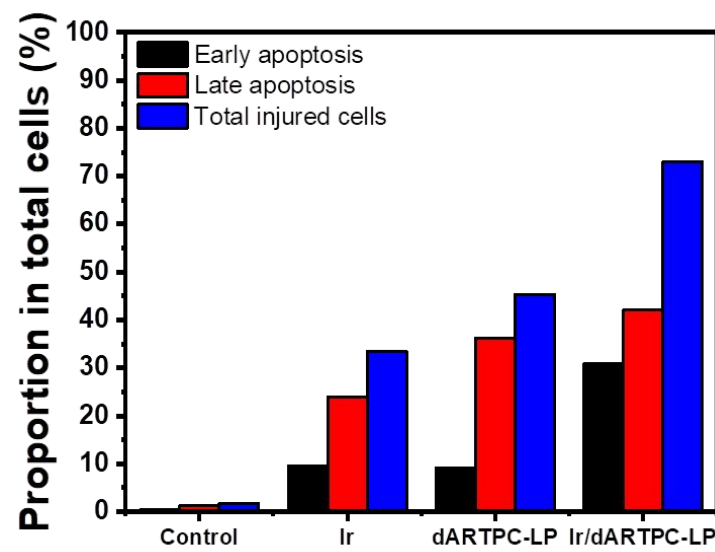

**Figure S3.** Quantitative analyses of MCF-7 cells after incubation of 24 h
